# Supplementary material for: Menstrual tracking app use in menstrual health self-management: A cross-sectional survey of user concerns, goals, and strategies
Source: Research Square preprint supplement (doi:10.21203/rs.3.rs-7096664/v1), 2025-09-16
Supplement: Supplementary file 1 [file fede5b598354e74b87d1d09c.pdf]

**Supplementary Materials**  
**Menstrual tracking app use in menstrual health self-management: A cross-sectional survey of  
user concerns, goals, and strategies**

**Table of contents**

|                                                                                                            |    |
|------------------------------------------------------------------------------------------------------------|----|
| Table S1. Respondent demographics, health status, and MTA use information for full cohort                  | 2  |
| Table S2. Reason for worry related to the menstrual cycle                                                  | 4  |
| Table S3. Symptoms of concern                                                                              | 4  |
| Table S4. Symptom management status of those with worries for each subgroup of cycle-related health issues | 5  |
| Table S5. Symptom management strategies                                                                    | 6  |
| Table S6. Goals of cycle tracking with an MTA                                                              | 6  |
| Table S7. Reported value of cycle tracking with Clue                                                       | 7  |
| Table S8. Reported value of cycle tracking with Clue                                                       | 7  |
| Table S9. Reported impact of tracking with Clue on symptom assessment and management                       | 8  |
| Table S10. Satisfaction with the Clue app                                                                  | 10 |
| Survey instrument (full questionnaire)                                                                     | 10 |

**Table S1. Respondent demographics, health status, and MTA use information for full cohort**  
(n=11 910; 137 countries were represented)

|                                                           | n (%)       |
|-----------------------------------------------------------|-------------|
| <b>Age (years)</b>                                        |             |
| 18-19                                                     | 1 139 (10%) |
| 20-24                                                     | 2 863 (24%) |
| 25-29                                                     | 2 392 (20%) |
| 30-34                                                     | 2 261 (19%) |
| 35-39                                                     | 1 684 (14%) |
| 40-44                                                     | 1 020 (9%)  |
| 45+                                                       | 547 (5%)    |
| No Answer                                                 | 4 (<1%)     |
| <b>Education level</b>                                    |             |
| Primary / elementary school or less                       | 77 (1%)     |
| Secondary / high school or equivalent                     | 3 307 (28%) |
| Trade school                                              | 546 (5%)    |
| Tertiary / university or equivalent                       | 5 102 (43%) |
| Postgraduate                                              | 2 878 (24%) |
| <b>Race/ethnicity</b> *multiple options could be selected |             |
| White                                                     | 8 637 (75%) |
| Black                                                     | 728 (6%)    |
| Asian                                                     | 1 032 (9%)  |
| Latinx                                                    | 1 309 (11%) |
| Arab                                                      | 144 (1%)    |
| Other                                                     | 564 (5%)    |
| *Selected more than one option                            | 648 (5%)    |
| <b>Current health rating</b>                              |             |
| Very good                                                 | 1 972 (17%) |

|                                                                     |             |
|---------------------------------------------------------------------|-------------|
| Good                                                                | 6 470 (54%) |
| Fair                                                                | 3 003 (25%) |
| Bad                                                                 | 438 (4%)    |
| Very bad                                                            | 27 (<1%)    |
| <b>Health conditions</b> *multiple options could be selected        |             |
| Heavy menstrual bleeding                                            | 1 369 (11%) |
| Endometriosis                                                       | 547 (5%)    |
| Polycystic ovary syndrome (PCOS)                                    | 1 225 (10%) |
| Perimenopause or menopause                                          | 245 (2%)    |
| Hypothyroidism                                                      | 661 (6%)    |
| Hyperthyroidism                                                     | 121 (1%)    |
| Uterine fibroids                                                    | 397 (3%)    |
| Anemia                                                              | 1771 (15%)  |
| Bleeding disorder                                                   | 36 (<1%)    |
| Irritable bowel syndrome (IBS) / Inflammatory bowel disease (IBD)   | 1 185 (10%) |
| Recurrent urinary tract infection (UTI) or bacterial vaginosis (BV) | 513 (4%)    |
| Myalgic encephalomyelitis (ME) / Chronic fatigue syndrome           | 136 (1%)    |
| Fibromyalgia                                                        | 231 (2%)    |
| Premenstrual dysphoric disorder (PMDD)                              | 591 (5%)    |
| Depression                                                          | 3 617 (30%) |
| Anxiety disorder (including PTSD, panic disorder, etc.)             | 4 191 (35%) |
| Attention deficit hyperactivity disorder (ADHD)                     | 1 766 (15%) |
| Autism                                                              | 650 (5%)    |
| I haven't been diagnosed with any of these conditions               | 4 179 (35%) |
| *Selected 2 or more                                                 | 5 294 (44%) |
| <b>Length of time using an MTA</b>                                  |             |
| Less than a year                                                    | 503 (4%)    |
| 1-2 years                                                           | 1 878 (16%) |
| 3-4 years                                                           | 3 755 (32%) |
| 5-6 years                                                           | 2 828 (24%) |
| 7-8 years                                                           | 1 690 (14%) |
| 9 or more years                                                     | 1 249 (10%) |
| <b>MTA subscription status</b>                                      |             |
| Yes, I'm currently subscribed                                       | 3 211 (27%) |

|                                   |             |
|-----------------------------------|-------------|
| Yes, but I'm no longer subscribed | 714 (6%)    |
| No, I've never subscribed         | 7 810 (66%) |
| I'm not sure                      | 168 (1%)    |

**Table S2. Reason for worry related to the menstrual cycle**

(n=7 898; those with worries) \*34% selected more than one reason

| <b>How would you best describe the reason for your worry about your menstrual cycle or related symptoms? *multiple options could be selected</b> |             |
|--------------------------------------------------------------------------------------------------------------------------------------------------|-------------|
| I am concerned about my health and / or my fertility                                                                                             | 3 414 (43%) |
| I am concerned about being prepared for my menstrual symptoms                                                                                    | 2 878 (36%) |
| I am concerned about how I will manage my daily life when I have my symptoms                                                                     | 4 979 (63%) |
| No answer                                                                                                                                        | 1 (<1%)     |

**Table S3. Symptoms of concern**

| <b>Which of the following menstrual cycle-related symptoms are you worried about? (n=7 898; those with worries) *multiple options could be selected</b>                        |             |
|--------------------------------------------------------------------------------------------------------------------------------------------------------------------------------|-------------|
| Body pain such as cramps, back pain, or headaches                                                                                                                              | 5 993 (76%) |
| Emotional symptoms such as sadness, anxiety, or mood swings                                                                                                                    | 5 971 (76%) |
| Tiredness, low energy, or low motivation                                                                                                                                       | 5 741 (73%) |
| Mental symptoms such as brain fog or difficulty focusing                                                                                                                       | 4 212 (53%) |
| Digestive symptoms such as nausea, diarrhea, or constipation                                                                                                                   | 3 958 (50%) |
| Heavy bleeding                                                                                                                                                                 | 3 567 (45%) |
| Irregular cycles / unpredictable periods                                                                                                                                       | 3 355 (43%) |
| Difficulty sleeping                                                                                                                                                            | 2 515 (33%) |
| Light headedness, dizziness, or fainting                                                                                                                                       | 2 027 (26%) |
| Too many days of bleeding / spotting                                                                                                                                           | 1 915 (24%) |
| Amount or type of discharge                                                                                                                                                    | 1 137 (14%) |
| Other - please specify:                                                                                                                                                        | 498 (6%)    |
| I am not worried about any cycle-related symptoms or participant did not answer                                                                                                | 46 (1%)     |
| <b>Which menstrual cycle-related symptom are you MOST concerned about? (n=7 852; those with worries and a specified symptom of concern) *only one option could be selected</b> |             |
| Body pain such as cramps, back pain, or headaches                                                                                                                              | 2 357 (30%) |
| Emotional symptoms such as sadness, anxiety, or mood swings                                                                                                                    | 1 776 (23%) |

|                                                              |             |
|--------------------------------------------------------------|-------------|
| Irregular cycles / unpredictable periods                     | 1 354 (17%) |
| Heavy bleeding                                               | 808 (10%)   |
| Too many days of bleeding / spotting                         | 334 (4%)    |
| Tiredness, low energy, or low motivation                     | 307 (4%)    |
| Mental symptoms such as brain fog or difficulty focusing     | 254 (3%)    |
| Digestive symptoms such as nausea, diarrhea, or constipation | 211 (3%)    |
| Light headedness, dizziness, or fainting                     | 106 (1%)    |
| Amount or type of discharge                                  | 76 (1%)     |
| Difficulty sleeping                                          | 43 (1%)     |
| Other - please specify:                                      | 195 (3%)    |
| No answer                                                    | 31 (<1%)    |

**Table S4. Symptom management status of those with worries for each subgroup of cycle-related health issues**

(n=7 852; respondents with worries and a specified symptom of concern)

|                                                                                                                      | Cycle-related health issues |                             |                         |
|----------------------------------------------------------------------------------------------------------------------|-----------------------------|-----------------------------|-------------------------|
|                                                                                                                      | None<br>(n=1 264; 16%)      | Potential<br>(n=4 606; 59%) | Known<br>(n=1 982; 25%) |
| <b>Which of the following best describes where you are at in your journey with your symptom(s)?</b>                  |                             |                             |                         |
| <b>I am just dealing with my symptoms as best I can on my own</b>                                                    | 846 (67%)                   | 2 783 (60%)                 | 983 (50%)               |
| <b>I am trying to decide whether something is wrong or not</b>                                                       | 215 (17%)                   | 983 (21%)                   | 100 (5%)                |
| <b>I am managing well with my current treatments or strategies</b>                                                   | 103 (8%)                    | 281 (6%)                    | 296 (15%)               |
| <b>I am working with a healthcare provider to try to improve my symptoms</b>                                         | 29 (2%)                     | 207 (4%)                    | 383 (19%)               |
| <b>I believe something is wrong and am working with a healthcare provider to find the cause / to get a diagnosis</b> | 11 (1%)                     | 302 (7%)                    | 126 (6%)                |
| <b>I am waiting for surgery / to start a new treatment</b>                                                           | 1 (<1%)                     | 13 (<1%)                    | 82 (4%)                 |
| <b>I don't think about them much (blocks other options) or no answer</b>                                             | 59 (5%)                     | 37 (1%)                     | 12 (1%)                 |

**Table S5. Symptom management strategies**

(n=7 898; those with worries) \*multiple options could be selected

| <b>How are you currently managing your symptoms? Select all that apply.</b>           | <b>n (%)</b> |
|---------------------------------------------------------------------------------------|--------------|
| Pain medications                                                                      | 5002 (63%)   |
| Symptom tracking (such as with an app)                                                | 4506 (57%)   |
| Non-medication pain relief like heating pads and TENS machine                         | 3126 (40%)   |
| Exercise                                                                              | 3068 (39%)   |
| Nutrition / diet                                                                      | 2655 (34%)   |
| Talking with a counselor / therapist                                                  | 1064 (14%)   |
| Medications specific to my condition                                                  | 942 (12%)    |
| Hormonal birth control                                                                | 909 (12%)    |
| Alternative therapies like natural remedies or acupuncture                            | 898 (11%)    |
| Consulting with a healthcare provider                                                 | 793 (10%)    |
| Other - please specify:                                                               | 327 (4%)     |
| Surgery                                                                               | 177 (2%)     |
| I am not doing anything specific for this symptom (blocks other options) or no answer | 460 (6%)     |

**Table S6. Goals of cycle tracking with an MTA**

(n=7 898; those with worries) \*multiple options could be selected

| <b>Which of the following best describes your goals with tracking in Clue?</b> | <b>n (%)</b> |
|--------------------------------------------------------------------------------|--------------|
| I want to track my period and get predictions for when it is coming            | 7 406 (94%)  |
| I am trying to better understand / find a pattern with my symptoms             | 4 889 (62%)  |
| I am monitoring my symptoms for changes                                        | 3 130 (40%)  |
| I already know my symptom patterns and track to be prepared for them           | 2 130 (27%)  |
| I am trying to figure out what triggers my symptoms                            | 1 998 (25%)  |
| I am gathering info about my symptoms for my healthcare provider               | 1 607 (20%)  |

|                                                                                                                |             |
|----------------------------------------------------------------------------------------------------------------|-------------|
| I want to monitor how my treatments or lifestyle changes are impacting my symptoms                             | 1 636 (21%) |
| I am trying to manage another aspect of my health while dealing with symptoms (such as trying to get pregnant) | 599 (8%)    |
| No answer                                                                                                      | 2 (<1%)     |

**Table S7. Reported value of cycle tracking with Clue**

(n=7 898; those with worries); data for Figure 2

|                                                                       | n (%)       |
|-----------------------------------------------------------------------|-------------|
| “Tracking with Clue helps me feel more prepared for my period”        |             |
| Agree                                                                 | 7 566 (96%) |
| Disagree                                                              | 57 (<1%)    |
| Neutral                                                               | 255 (3%)    |
| Not applicable                                                        | 20 (<1%)    |
| “Tracking with Clue helps me understand my body and cycle patterns”   |             |
| Agree                                                                 | 7 120 (90%) |
| Disagree                                                              | 127 (2%)    |
| Neutral                                                               | 598 (8%)    |
| Not applicable                                                        | 53 (<1%)    |
| “Tracking with Clue has made me feel more “in control” of my health”  |             |
| Agree                                                                 | 5 676 (72%) |
| Disagree                                                              | 299 (4%)    |
| Neutral                                                               | 1 838 (23%) |
| Not applicable                                                        | 85 (1%)     |
| “I would have more stress related to my health if I did not use Clue” |             |
| Agree                                                                 | 5 088 (64%) |
| Disagree                                                              | 705 (9%)    |
| Neutral                                                               | 1678 (21%)  |
| Not applicable                                                        | 427 (5%)    |

**Table S8. Reported value of cycle tracking with Clue**

(n=11 910; full study cohort)

|                                                                      | N (%)        |
|----------------------------------------------------------------------|--------------|
| “Tracking with Clue helps me feel more prepared for my period”       |              |
| Agree                                                                | 11 427 (96%) |
| Disagree                                                             | 83 (<1%)     |
| Neutral                                                              | 369 (3%)     |
| Not applicable                                                       | 31 (<1%)     |
| “Tracking with Clue helps me understand my body and cycle patterns”  |              |
| Agree                                                                | 10 744 (90%) |
| Disagree                                                             | 185 (2%)     |
| Neutral                                                              | 886 (7%)     |
| Not applicable                                                       | 95 (<1%)     |
| “Tracking with Clue has made me feel more “in control” of my health” |              |
| Agree                                                                | 8 598 (72%)  |
| Disagree                                                             | 400 (3%)     |
| Neutral                                                              | 2 737 (23%)  |
| Not applicable                                                       | 175 (1%)     |
| I would have more stress related to my health if I did not use Clue  |              |
| Agree                                                                | 7 233 (61%)  |
| Disagree                                                             | 1 179 (10%)  |
| Neutral                                                              | 2 676 (22%)  |
| Not applicable                                                       | 822 (7%)     |

**Table S9. Reported impact of tracking with Clue on symptom assessment and management data for figure 3**

|                                                                                                                     | n (%)       |
|---------------------------------------------------------------------------------------------------------------------|-------------|
| <b>Tracking with Clue has helped me feel more prepared for my symptoms (n=7 852<sup>a</sup>)</b>                    |             |
| Agree                                                                                                               | 6 394 (81%) |
| Disagree                                                                                                            | 285 (4%)    |
| Neutral                                                                                                             | 1 060 (14%) |
| Not applicable                                                                                                      | 113 (1%)    |
| <b>Tracking with Clue has helped me identify things that make my symptoms better or worse (n=7 852<sup>a</sup>)</b> |             |



|                                                                                                                      |             |
|----------------------------------------------------------------------------------------------------------------------|-------------|
| Agree                                                                                                                | 2 828 (36%) |
| Disagree                                                                                                             | 1 350 (17%) |
| Neutral                                                                                                              | 2 950 (38%) |
| Not applicable                                                                                                       | 724 (9%)    |
| <b>Tracking with Clue has helped me decrease my menstrual cycle symptoms (n=7 852<sup>a</sup>)</b>                   |             |
| Agree                                                                                                                | 1 005 (13%) |
| Disagree                                                                                                             | 3 224 (41%) |
| Neutral                                                                                                              | 2 670 (34%) |
| Not applicable                                                                                                       | 953 (12%)   |
| <b>Tracking with Clue helped me discover an issue with my health (n=7 852<sup>a</sup>)</b>                           |             |
| Agree                                                                                                                | 2 460 (31%) |
| Disagree                                                                                                             | 1 394 (18%) |
| Neutral                                                                                                              | 2 272 (29%) |
| Not applicable                                                                                                       | 1 726 (22%) |
| <b>Tracking with Clue has validated my feeling that there might be an issue with my health (n=7 852<sup>a</sup>)</b> |             |
| Agree                                                                                                                | 3 910 (50%) |
| Disagree                                                                                                             | 669 (9%)    |
| Neutral                                                                                                              | 2 010 (26%) |
| Not applicable                                                                                                       | 1 262 (16%) |
| No answer                                                                                                            | 1 (<1%)     |
| <b>Tracking with Clue increases my confidence in talking to a healthcare provider about my symptoms (n=7 852)</b>    |             |
| Agree                                                                                                                | 4 737 (60%) |
| Disagree                                                                                                             | 550 (7%)    |
| Neutral                                                                                                              | 1 660 (21%) |
| Not applicable                                                                                                       | 904 (12%)   |
| No answer                                                                                                            | 1 (<1%)     |
| <b>Tracking with Clue helped me decide to talk to my healthcare provider about my health (n=4 128<sup>b</sup>)</b>   |             |
| Agree                                                                                                                | 2 428 (59%) |

|                                                                                                                      |             |
|----------------------------------------------------------------------------------------------------------------------|-------------|
| Disagree                                                                                                             | 296 (7%)    |
| Neutral                                                                                                              | 922 (22%)   |
| Not applicable                                                                                                       | 482 (12%)   |
| <b>Tracking with Clue helped me get a diagnosis or treatment for my symptom(s) / condition (n=5 599<sup>c</sup>)</b> |             |
| Agree                                                                                                                | 1 187 (21%) |
| Disagree                                                                                                             | 858 (15%)   |
| Neutral                                                                                                              | 1 350 (24%) |
| Not applicable                                                                                                       | 2 204 (39%) |

<sup>a</sup>those with worries and a specified symptom of concern

<sup>b</sup>those with worries who said yes to 'Have you spoken to a healthcare provider about this symptom?'

<sup>c</sup>those with worries who said 'I received a diagnosis or treatment for my symptom(s)' to 'What was the result of your conversation with your healthcare provider(s)?' or indicated a diagnosis for 'Has a healthcare provider diagnosed you with any of the following health conditions?'

**Table S10. Satisfaction with the Clue app**

|                                                   | n (%)        |
|---------------------------------------------------|--------------|
| <b>"How satisfied are you with the Clue app?"</b> |              |
| <b>Those with worries (n=7 898)</b>               |              |
| Satisfied                                         | 7 212 (91%)  |
| Neutral                                           | 531 (7%)     |
| Dissatisfied                                      | 155 (2%)     |
| <b>Full study cohort (n=11 910)</b>               |              |
| Satisfied                                         | 10 929 (92%) |
| Neutral                                           | 762 (6%)     |
| Dissatisfied                                      | 219 (2%)     |

#### Survey instrument (full questionnaire)

1. **\*How old are you?**
  - a. 17 or younger (→ exclude)
  - b. Ages 18-100 in dropdown
2. **What country do you live in?**
  - a. Dropdown of all countries

- 3. What is the highest level of education you have completed?**
- a. Primary / elementary school or less
  - b. Secondary education / high school or equivalent (diploma)
  - c. Trade school
  - d. Tertiary education / university or equivalent (Bachelor's degree)
  - e. Postgraduate education (Master's, Doctorate, or similar)
- 4. What would you describe yourself as? Select all that apply.**
- a. White
  - b. Black
  - c. Asian
  - d. Latinx
  - e. Arab
  - f. Other
  - g. I would prefer not to answer
- 5. In general, how would you rate your current health?**
- a. Very good
  - b. Good
  - c. Fair
  - d. Bad
  - e. Very bad
- 6. Has a healthcare provider diagnosed you with any of the following health conditions?**  
Select all that apply.
- a. Heavy menstrual bleeding
  - b. Endometriosis
  - c. Polycystic ovary syndrome (PCOS)
  - d. Perimenopause or menopause
  - e. Hypothyroidism
  - f. Hyperthyroidism
  - g. Uterine fibroids
  - h. Anemia
  - i. Bleeding disorder (such as von Willebrand disease)
  - j. Irritable bowel syndrome (IBS) / Inflammatory bowel disease (IBD)
  - k. Recurrent urinary tract infection (UTI) or bacterial vaginosis (BV)
  - l. Myalgic encephalomyelitis (ME) / Chronic fatigue syndrome
  - m. Fibromyalgia
  - n. Premenstrual dysphoric disorder (PMDD)
  - o. Depression
  - p. Anxiety disorder (including PTSD, panic disorder, etc.)
  - q. Attention deficit hyperactivity disorder (ADHD)
  - r. Autism
  - s. I haven't been diagnosed with any of these conditions
- 7. How regular is your menstrual period usually?**
- a. Very regular: usually within 1-4 days of when I expect it
  - b. Somewhat regular: Usually within 5-9 days of when I expect it
  - c. Unpredictable: usually 10 or more days from when I expect it
  - d. I don't keep track of when my period will come
  - e. I haven't had a period in the last 3 months (--> exclude)

8. **For how long have you been using an app to track your periods / cycles?**
- Less than a year
  - 1-2 years
  - 3-4 years
  - 5-6 years
  - 7-8 years
  - 9 or more years
9. **What are the main reason(s) you currently use Clue?** Select all that apply.
- To track my period and / or know when it is coming
  - To discover my cycle patterns and understand my body better
  - To track or manage specific symptoms or a health condition
  - To gather information for my healthcare provider
  - To help me avoid pregnancy
  - To help me get pregnant
  - To track when I take/get my birth control
  - To track my pregnancy or postpartum experiences
  - To track my perimenopause symptoms
  - Other - please specify:
10. **Have you used Clue Plus, the paid version of Clue?**
- Yes, I'm currently subscribed
  - Yes, but I'm no longer subscribed
  - No, I've never subscribed
  - I'm not sure
11. **Considering all of your menstrual cycle symptoms together, how would you rate the overall severity of your menstrual cycle experience?** You can consider things like unpredictable periods, heavy bleeding, or other cycle-related symptoms like pain or mood changes.
- 0 No symptoms
  - 1
  - 2
  - 3
  - 4
  - 5
  - 6
  - 7
  - 8
  - 9
  - 10 Worst symptoms possible
12. **How much impact do your menstrual symptoms have on your overall quality of life?**
- No impact
  - Little impact
  - Some impact
  - A lot of impact
  - A tremendous impact
13. **\*Which of the following best describes how you think about your menstrual cycle experiences and any possibly related health issues?** You can consider things like cycle regularity, bleeding heaviness, and cycle-related symptoms like pain or mood changes.
- I don't think I have any cycle-related issues
  - I think I may have (or am not sure if I have) a health issue that affects or is affected by my menstrual cycles
  - I have a known health issue that affects or is affected by my menstrual cycles

**14. \*How worried are you about your menstrual cycle or related symptoms?**

- a. Not worried
- b. Slightly worried
- c. Moderately worried
- d. Worried
- e. Very worried

**15. If selected 14b-e How would you best describe the reason for your worry about your menstrual cycle or related symptoms? Can select any**

- a. I am concerned about my health and / or my fertility
- b. I am concerned about being prepared for my menstrual symptoms
- c. I am concerned about how I will manage my daily life when I have my symptoms

**\*\*13 b and c get the full section 2 regardless of what they answer to 14; if they answer a to 13 but b through e for 14, still get section 2; if they answer a to 13 and 14, go to section 3**

**(Section 2- only for those with conditions/concerns) The next section is about your menstrual cycle experiences and how you are managing them.**

**16. Which of the following menstrual cycle-related symptoms are you worried about? Please include any symptoms you are currently treating and may have under control (for example, with hormonal birth control).**

- a. Irregular cycles / unpredictable periods
- b. Heavy bleeding
- c. Too many days of bleeding / spotting
- d. Amount or type of discharge
- e. Body pain such as cramps, back pain, or headaches
- f. Mental symptoms such as brain fog or difficulty focusing
- g. Emotional symptoms such as sadness, anxiety, or mood swings
- h. Tiredness, low energy, or low motivation
- i. Light headedness, dizziness, or fainting
- j. Digestive symptoms such as nausea, diarrhea, or constipation
- k. Other [please specify]
- l. I am not worried about any cycle-related symptoms (blocks other options; skip to section 3)

**17. (if more than one symptom selected) Which menstrual cycle-related symptom are you most concerned about? Please still consider any symptoms you are currently treating and may have under control (for example, with hormonal birth control).**

- a. Pick in selections from 16

**18. Thinking about the symptom you are most concerned about, approximately how often does it happen?**

- a. Every cycle
- b. Every other cycle
- c. Once every 3 cycles
- d. Less than once every 3 cycles

**19. For how long have you been concerned about this symptom?**

- a. Less than a year
- b. 1-2 years
- c. 3-4 years
- d. 5-6 years
- e. 7-8 years
- f. 9 or more years

20. Have you spoken to a healthcare provider about this symptom?
- Yes [go to 22]
  - No and I don't plan to [go to 21]
  - Not yet, I am still deciding if my symptoms are a problem [skip to where in journey are you]
  - Not yet, but I plan to [skip to where in journey are you]
21. [if No and do not plan to] Why haven't you talked to a healthcare provider about your symptom? Select all that apply. Answers randomized
- I've never thought about talking to a healthcare provider about this
  - I would rather not speak to a healthcare provider unless I really have to
  - My symptoms aren't bad enough
  - There's nothing they can do about it
  - They don't take my concerns seriously
  - I don't have access to the right healthcare providers
  - Healthcare is too expensive
  - It is too difficult to arrange visits with healthcare providers
  - Other - please specify:
22. [If Yes] What was the result of your conversation with your healthcare provider(s)?
- I received a diagnosis or treatment for my symptom(s)
  - I was told it is normal / not a problem
  - I am still working with healthcare providers to figure it out
  - My healthcare providers didn't know what to do / can't figure it out
  - Other - please specify:
23. [If Yes] How satisfied were you with your experience with your healthcare provider(s)?
- Very satisfied
  - Somewhat satisfied
  - Neither satisfied nor dissatisfied
  - Somewhat dissatisfied
  - Very dissatisfied
24. [if yes] What were the biggest challenges in getting support with your diagnosis?
- Healthcare providers didn't take my symptoms seriously
  - I didn't have access to the right healthcare providers
  - Visiting healthcare providers was expensive
  - It was difficult to arrange visits with healthcare providers
  - Healthcare providers didn't know what to do / couldn't figure it out
  - Other - please specify:
  - It was not a challenge to get support (blocks other options)
25. [everyone who selects symptoms they are concerned about] Which of the following best describes where you are at in your journey with your symptoms?
- I am just dealing with my symptoms as best I can on my own
  - I am trying to decide whether something is wrong or not
  - I believe something is wrong and am working with a healthcare provider to find the cause / to get a diagnosis
  - I am working with a healthcare provider to try to improve my symptoms
  - I am managing well with my current treatments or strategies
  - I am waiting for surgery / to start a new treatment
  - I don't think about them much (blocks other options)

26. [everyone who selects symptoms they are concerned about] **How are you currently managing your symptoms? Select all that apply.**

- a. Non-medication pain relief like heating pads and TENS machine
- b. Pain medications
- c. Medications specific to my condition
- d. Hormonal birth control
- e. Symptom tracking (such as with an app)
- f. Nutrition/diet
- g. Exercise
- h. Alternative therapies like natural remedies or acupuncture
- i. Talking with a counselor/therapist
- j. Consulting with a healthcare provider
- k. Surgery
- l. Other - please specify:
- m. I am not doing anything specific for this symptom (blocks other options)

27. [everyone sees] **In general, what are your biggest challenges related to your menstrual health? Select all that apply**

- a. Trying to figure out if there is an issue
- b. Managing my symptoms
- c. Getting taken seriously by healthcare providers
- d. Getting access to the right healthcare providers
- e. Getting a diagnosis for my symptoms
- f. Managing the logistics of healthcare (such as transportation and time for appointments)
- g. Managing my daily life while having my symptoms
- h. Managing the stress / emotional burden of my symptoms
- i. Paying for healthcare / treatments related to my symptoms
- j. Other - please specify:
- k. Everything currently feels very manageable (blocks other options)

28. Is there anything else you'd like to tell us to help us understand your menstrual cycle challenges?

**(section 3)** You're at the final section! We will now ask about how you use the Clue app to support you with your health goals.

29. **Which of the following best describes when you track in Clue?**

- a. I only track during my period
- b. I mainly track during my period, but sometimes at other times
- c. I regularly track even when I don't have my period

30. **Which of the following have you tracked in Clue in the last 60 days?**

- a. Menstrual bleeding / spotting
- b. Signs of my fertile window like basal body temperature, cervical fluid, or ovulation pain
- c. Physical experiences like pain, digestive issues, hair, or skin
- d. Mental health experiences like feelings, energy, or focus
- e. Events / activities like sleep, sex, exercise, or taking birth control
- f. I haven't tracked anything in the last 60 days (blocks other options)

31. **Which of the following best describes your goals with tracking in Clue?** Select all that apply.

- a. I want to track my period and get predictions for when it is coming
- b. I am trying to better understand / find a pattern with my symptoms
- c. I already know my symptom patterns and track to be prepared for them
- d. I am monitoring my symptoms for changes

- e. I am trying to figure out what triggers my symptoms
- f. I am gathering info about my symptoms for my healthcare provider
- g. I want to monitor how my treatments or lifestyle changes are impacting my symptoms
- h. I am trying to manage another aspect of my health while dealing with symptoms (such as trying to get pregnant)

32. **[If more than one goal selected] Which goal is currently the most important to you?**  
 a. Pipe in answers selected from 31

**Select the extent to which you agree or disagree with the following statements.**

*Strongly disagree – Somewhat disagree – Neither agree nor disagree – Somewhat agree – Strongly agree – Not applicable*

**General**

- 33. **(all)** Tracking with Clue helps me feel more prepared for my period
- 34. **(all)** Tracking with Clue helps me better understand my body and cycle patterns
- 35. **(all)** Tracking with Clue has made me feel more “in control” of my health

**If have worries about symptoms**

- 36. **(if saw section 2)** Tracking with Clue has helped me feel more prepared for my symptoms
- 37. **(if saw section 2)** Tracking with Clue has helped me identify things that make my symptoms better or worse
- 38. **(if saw section 2)** Tracking with Clue has helped me decrease my menstrual cycle symptoms
- 39. **(if saw section 2)** Tracking with Clue helped me discover an issue with my health
- 40. **(if saw section 2)** Tracking with Clue has validated my feeling that there might be an issue with my health
- 41. **(if saw section 2)** Tracking with Clue increases my confidence in talking to a healthcare provider about my symptoms

**If talked to HCP**

- 42. **(if talked to HCP)** Tracking with Clue helped me decide to talk to my healthcare provider about my health

**If have diagnosis**

- 43. **(if have diagnosis)** Tracking with Clue helped me get a diagnosis or treatment for my symptom(s) / condition

**Final**

- 44. **(all)** I would have more stress related to my health if I did not use Clue

- 45. **How satisfied are you with the Clue app?**

- a. *Strongly dissatisfied – Somewhat dissatisfied – Neither nor – Somewhat satisfied – Strongly satisfied*

- 46. **Which of these additional app functionalities would be useful for you?**

- a. More detailed tracking options
- b. Content about my symptoms and health conditions relevant to me
- c. Recommendations for other things I could track
- d. Recommendations for lifestyle changes that could improve my symptoms
- e. Support in managing my treatments such as tracking and reminders
- f. A report of my symptoms for my healthcare provider
- g. Improved analysis of my symptom patterns



- h. Predictions for when I may experience symptoms
- i. Access to health care providers through the app
- j. Space to connect with other people who have the same health concerns
- k. A diary or note taking feature
- l. Other - please specify:
- m. None of the above (blocks other options)

**47. Is there anything else you'd like to tell us about how you use Clue to support your menstrual health?**

*Open text field*
